# Supplementary material for: Serotonin transporter gene polymorphism modulates inflammatory cytokine responses during acute stress
Source: PubMed Central journal article supplement (PMC4563370; doi:10.1038/srep13852), 2015-09-09

Serotonin transporter gene polymorphism modulates inflammatory cytokine responses  
during acute stress

Kaori Yamakawa<sup>a,b</sup>, Masahiro Matsunaga<sup>c</sup>, Tokiko Isowa<sup>d</sup>, Hideki Ohira<sup>a</sup>

<sup>a</sup>Department of Psychology, Graduate School of Environmental Studies, Nagoya  
University, Aichi, Japan

<sup>b</sup>Department of Psychology, School of Humanities, Tokaigakuen University, Aichi,  
Japan

<sup>c</sup>Department of Health and Psychosocial Medicine, School of Medicine, Aichi Medical  
University, Aichi, Japan

<sup>d</sup> School of Nursing, Faculty of Medicine, Mie University, Mie, Japan

#### Conflict of Interest Statement

All authors declare that there are no conflicts of interest.

\*Correspondence should be addressed to Kaori Yamakawa

Department of Psychology, School of Humanities, Tokaigakuen University, 2-901,  
Nakahira, Tenpaku-ku, Aichi, 468-8514, Japan

Phone: +81 52-801-1201 E-mail: kaori.yamakaw@gmail.com

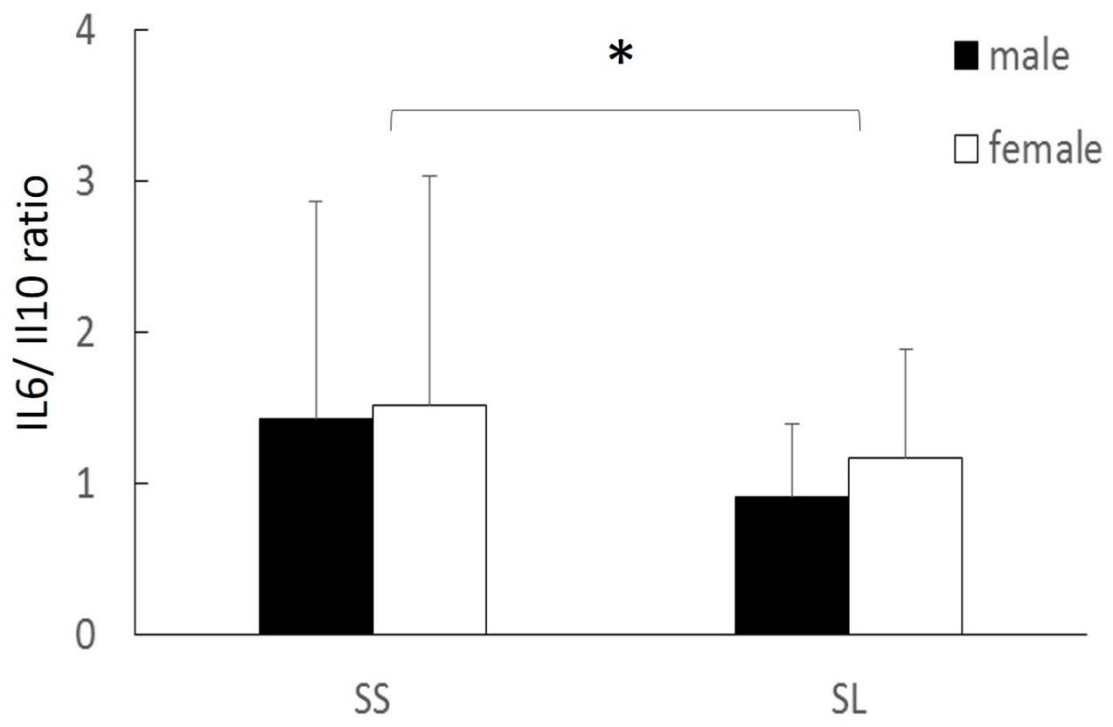

Supplement: srep13852-s1.pdf [file srep13852-s1.pdf]
